# Supplementary material for: Comparative Transcriptomics Analysis Reveals the Differences in Transcription between Resistant and Susceptible Pepper (Capsicum annuum L.) Varieties in Response to Anthracnose
Source: Plants (Basel). 2024 Feb 15;13(4):527. doi: 10.3390/plants13040527 (PMC10892400; doi:10.3390/plants13040527)
Supplement: Supplementary file 1 [file plants-13-00527-s001.zip › plants-2739106-supplementary-Table.pdf]

## *Supplementary Material*

Article title: **Comparative Transcriptomics Analysis Reveals the Differences in Transcription between Resistant and Susceptible Pepper (*Capsicum annuum* L.) Varieties in Response to Anthracnose**

There are one supplementary table, and the following supplementary information is available for this article:

**Supplementary Table S1 The diameter of the spot after infection with colletotrichum in pepper material**

| Pepper materials | Lesion diameter (cm) | Colletotrichum capsici |
|------------------|----------------------|------------------------|
| B161             | 1.57                 | TJ-3-3                 |
| B85              | 1.14                 | TJ-3-3                 |
| B75              | 1.07                 | TJ-3-3                 |
| B87              | 0.78                 | TJ-3-3                 |
| B73              | 1.05                 | TJ-3-3                 |
| B78              | 1.45                 | TJ-3-3                 |
| B74              | 0.70                 | TJ-3-3                 |
| B2               | 0.67                 | TJ-3-3                 |
| B68              | 0.76                 | TJ-3-3                 |
| B41              | 0.55                 | TJ-3-3                 |
| B19              | 0.47                 | TJ-3-3                 |
| B71              | 0.63                 | TJ-3-3                 |
| B76              | 0.56                 | TJ-3-3                 |
| B72              | 0.58                 | TJ-3-3                 |
| B77              | 0.51                 | TJ-3-3                 |
| B70              | 0.53                 | TJ-3-3                 |
| B158             | 0.46                 | TJ-3-3                 |
